# Supplementary material
Source: PubMed Central journal article supplement (PMC5864200)
Supplement: 41396_2018_79_MOESM1_ESM.pdf [file 41396_2018_79_MOESM1_ESM.pdf]

SUPPLEMENTAL MATERIAL

Table S1. PERMANOVA results for the UniFrac pairwise dissimilarity of the relative abundance of bacterial sequences, based on 16S gene, and the Bray-Curtis distance of the relative abundance of fungal sequences, based on ITS gene Illumina MiSeq sequencing, using a non-parametric permutational approach. The explanatory variables are activity, precipitation pattern, depth and their interaction. The analysis is nested by mesocosm.

| Source of variation                | Degrees of freedom | Sum of squares | Mean squares | F value | R2    | P value |
|------------------------------------|--------------------|----------------|--------------|---------|-------|---------|
| <b>Bacteria</b>                    |                    |                |              |         |       |         |
| <i>Mesocosm level</i>              |                    |                |              |         |       |         |
| Activity                           | 1                  | 0.754          | 0.754        | 92.33   | 0.611 | <0.001  |
| Precip. pattern                    | 1                  | 0.014          | 0.014        | 1.667   | 0.011 | 0.176   |
| Activity × Precip. pattern         | 1                  | 0.003          | 0.003        | 0.39    | 0.003 | 0.745   |
| Residuals                          | 22                 | 0.180          | 0.008        |         | 0.146 |         |
| <i>Depth level</i>                 |                    |                |              |         |       |         |
| Depth                              | 2                  | 0.049          | 0.024        | 3.185   | 0.040 | 0.021   |
| Depth × Activity                   | 2                  | 0.021          | 0.011        | 1.389   | 0.017 | 0.225   |
| Depth × Precip. pattern            | 2                  | 0.023          | 0.012        | 1.531   | 0.019 | 0.186   |
| Depth × Activity × Precip. pattern | 2                  | 0.014          | 0.007        | 0.915   | 0.011 | 0.413   |
| Residuals                          | 36                 | 0.275          | 0.008        |         | 0.223 |         |
| <b>Fungi</b>                       |                    |                |              |         |       |         |
| <i>Mesocosm level</i>              |                    |                |              |         |       |         |
| Activity                           | 1                  | 0.813          | 0.813        | 11.956  | 0.093 | <0.001  |
| Precip. pattern                    | 1                  | 0.323          | 0.323        | 4.748   | 0.037 | <0.001  |
| Activity × Precip. pattern         | 1                  | 0.071          | 0.071        | 1.047   | 0.008 | 0.347   |
| Residuals                          | 22                 | 1.495          | 0.068        |         | 0.171 |         |
| <i>Depth level</i>                 |                    |                |              |         |       |         |
| Depth                              | 2                  | 1.246          | 0.623        | 5.622   | 0.143 | <0.001  |
| Depth × Activity                   | 1                  | 0.071          | 0.071        | 0.643   | 0.008 | 0.929   |
| Depth × Precip. pattern            | 2                  | 0.517          | 0.258        | 2.333   | 0.059 | 0.001   |
| Depth × Activity × Precip. pattern | 2                  | 0.148          | 0.074        | 0.668   | 0.017 | 0.974   |
| Residuals                          | 36                 | 3.988          | 0.111        |         | 0.457 |         |

Table S2. PERMANOVA results for the UniFrac pairwise dissimilarity and the Bray-Curtis distance of the relative abundance of bacterial and fungal sequences, based on 16S and ITS gene Illumina MiSeq sequencing, respectively, both in the active and the inactive communities, using a non-parametric permutational approach. The explanatory variables are precipitation pattern, depth and their interaction. The analysis is nested by mesocosm.

| Source of variation                 | Degrees of freedom | Sum of squares | Mean squares | F value | R2    | P value |
|-------------------------------------|--------------------|----------------|--------------|---------|-------|---------|
| <b>Active bacterial community</b>   |                    |                |              |         |       |         |
| Precip. pattern                     | 1                  | 0.010          | 0.010        | 0.998   | 0.032 | 0.096   |
| Depth                               | 2                  | 0.038          | 0.019        | 1.837   | 0.119 | 0.038   |
| Mesocosm                            | 8                  | 0.103          | 0.013        | 1.243   | 0.322 | 0.163   |
| Precip. Pattern × Depth             | 2                  | 0.024          | 0.012        | 1.133   | 0.073 | 0.324   |
| Residuals                           | 14                 | 0.146          | 0.010        |         | 0.453 |         |
| <b>Inactive bacterial community</b> |                    |                |              |         |       |         |
| Precip. pattern                     | 1                  | 0.006          | 0.006        | 1.880   | 0.041 | 0.106   |
| Depth                               | 2                  | 0.032          | 0.016        | 4.632   | 0.200 | <0.001  |
| Mesocosm                            | 8                  | 0.062          | 0.008        | 2.272   | 0.393 | <0.001  |
| Precip. Pattern × Depth             | 2                  | 0.010          | 0.005        | 1.447   | 0.063 | 0.089   |
| Residuals                           | 14                 | 0.048          | 0.003        |         | 0.303 |         |
| <b>Active fungal community</b>      |                    |                |              |         |       |         |
| Precip. pattern                     | 1                  | 0.250          | 0.250        | 1.515   | 0.050 | 0.002   |
| Depth                               | 2                  | 0.853          | 0.427        | 2.585   | 0.170 | 0.001   |
| Mesocosm                            | 8                  | 1.222          | 0.153        | 0.926   | 0.243 | 0.002   |
| Precip. Pattern × Depth             | 2                  | 0.395          | 0.197        | 1.196   | 0.078 | 0.176   |
| Residuals                           | 14                 | 2.311          | 0.165        |         | 0.459 |         |
| <b>Inactive fungal community</b>    |                    |                |              |         |       |         |
| Precip. pattern                     | 1                  | 0.144          | 0.144        | 1.704   | 0.050 | 0.017   |
| Depth                               | 2                  | 0.588          | 0.294        | 3.485   | 0.204 | 0.001   |
| Mesocosm                            | 8                  | 0.708          | 0.088        | 1.048   | 0.245 | 0.393   |
| Precip. Pattern × Depth             | 2                  | 0.268          | 0.134        | 1.589   | 0.093 | 0.009   |
| Residuals                           | 14                 | 1.182          | 0.084        |         | 0.409 |         |

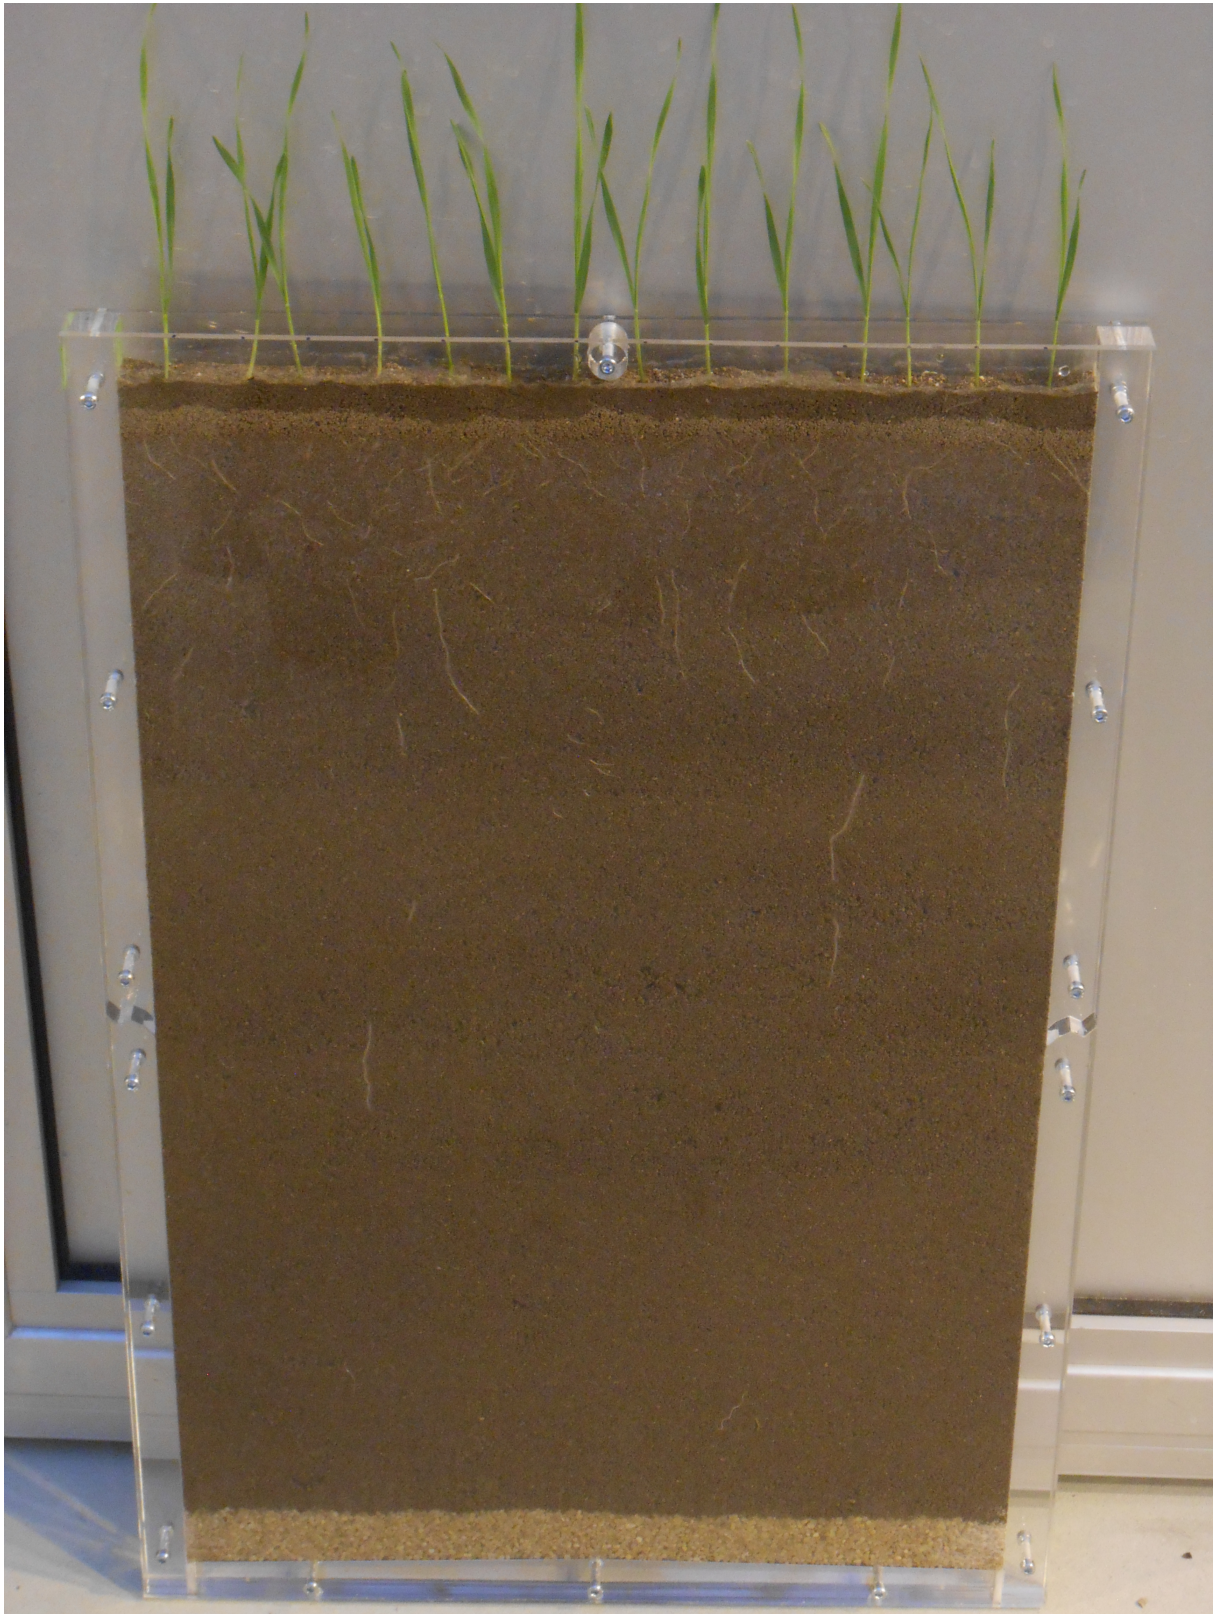

Fig. S1. Photograph of one of the mesocosms used in the study.

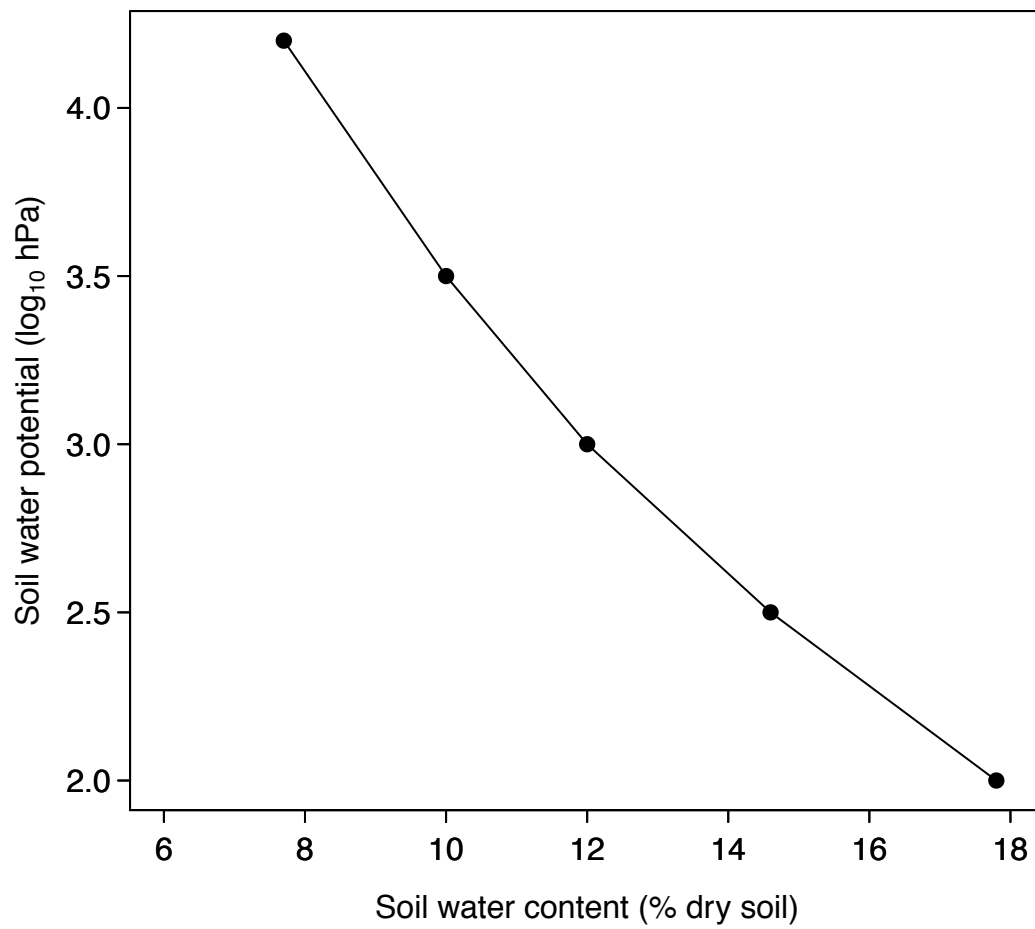

Fig. S2. Theoretical soil water retention curve for our soil, based on pedotransfer functions that used soil texture, bulk density as well as soil horizon (Al Majou *et al.*, 2008).

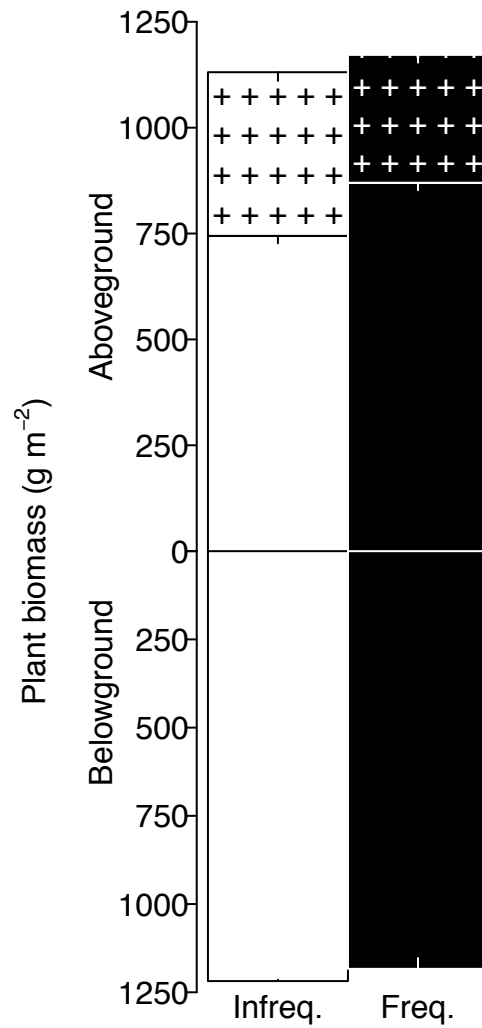

Fig. S3. Plant biomass in the infrequent watering (open bars) and frequent watering (closed bars) treatments. The polygons filled with crosses indicate dead aboveground biomass. Bars indicate mean, ticks inside the bars indicate standard error (n=5).

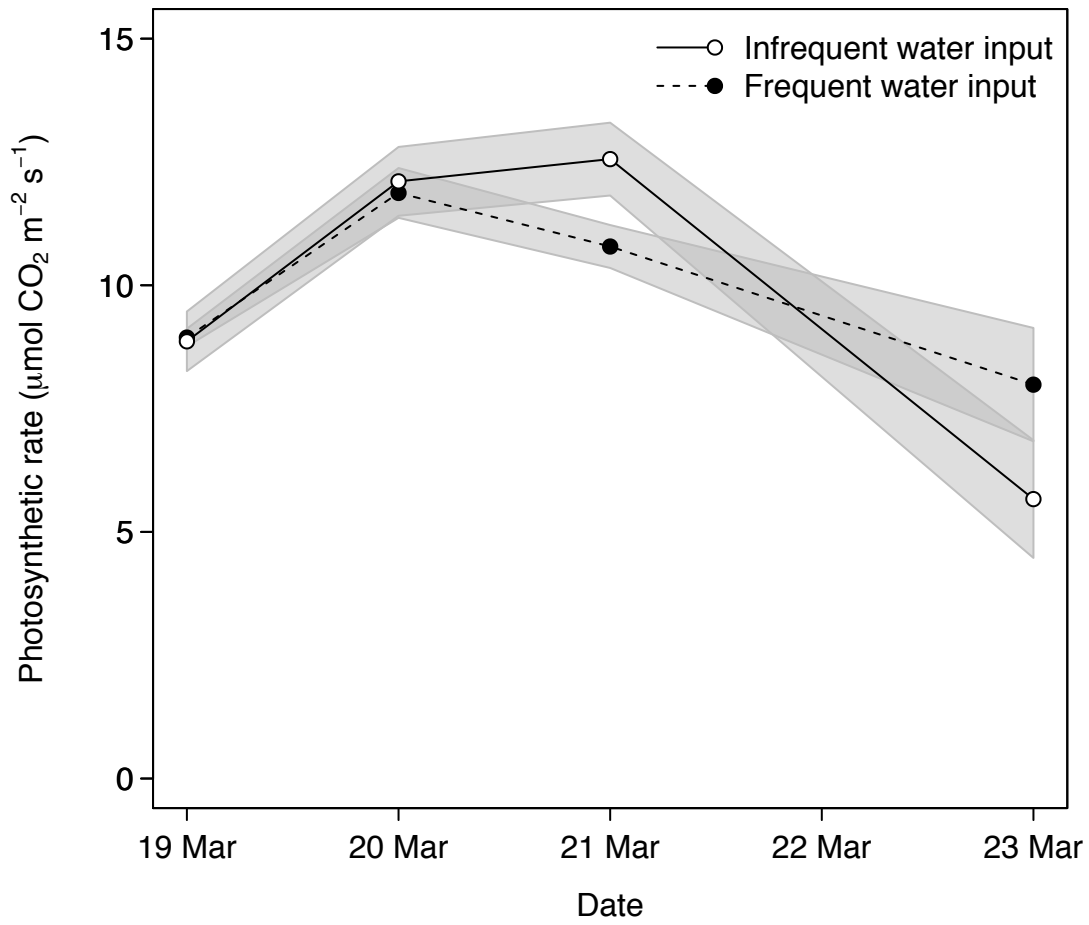

Fig. S4. Plant photosynthetic rate, scaled by plant leaf area for each experiment treatment (infrequent and frequent water input, full and dashed curves, respectively).

Shaded polygons indicate  $\pm$ standard error of the mean.

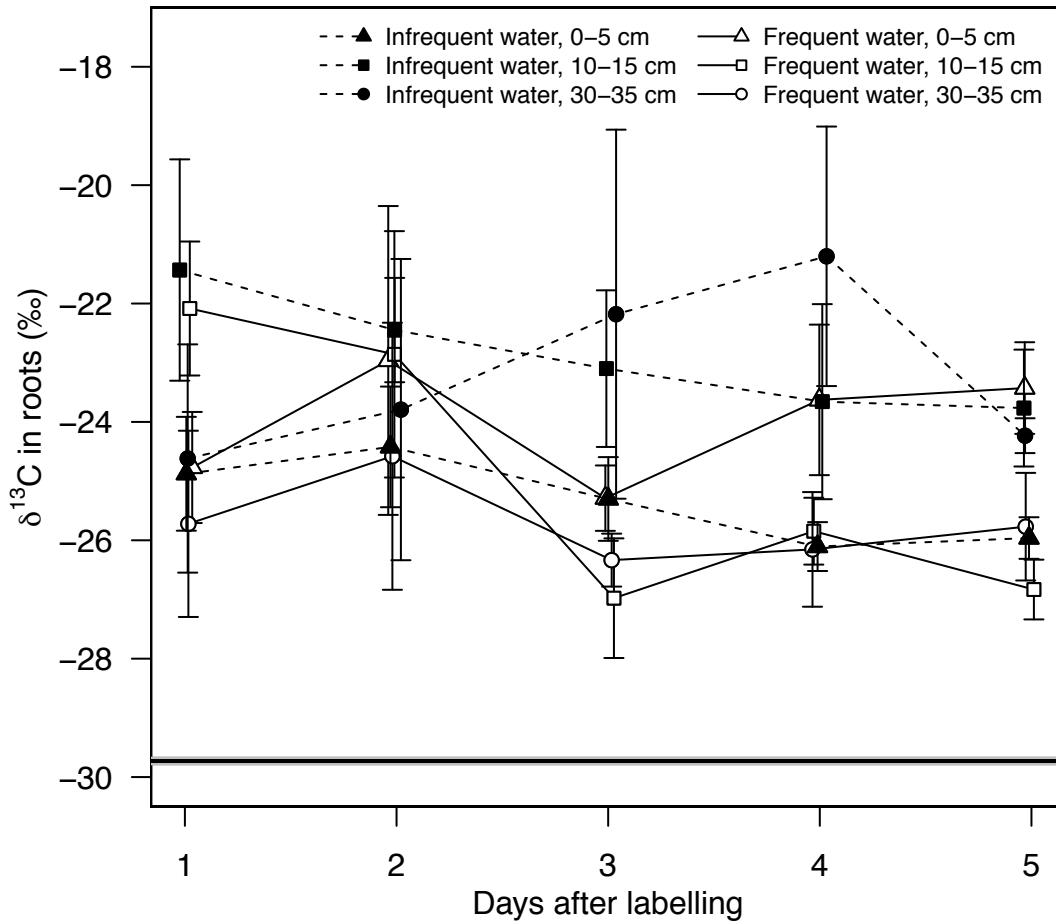

Fig. S5.  $^{13}\text{C}$  signature in roots (mean $\pm$ se), over 5 days after plant  $^{13}\text{C}\text{-CO}_2$  labeling, in the infrequent (open symbols) and frequent (closed symbols) water input treatments, at three depths (top: 0–5 cm, triangles; middle: 10–15 cm, squares, bottom: 30–35 cm, circles). Background root  $^{13}\text{C}$  signature mean  $\pm$  standard error is shown (horizontal line and grey polygon).

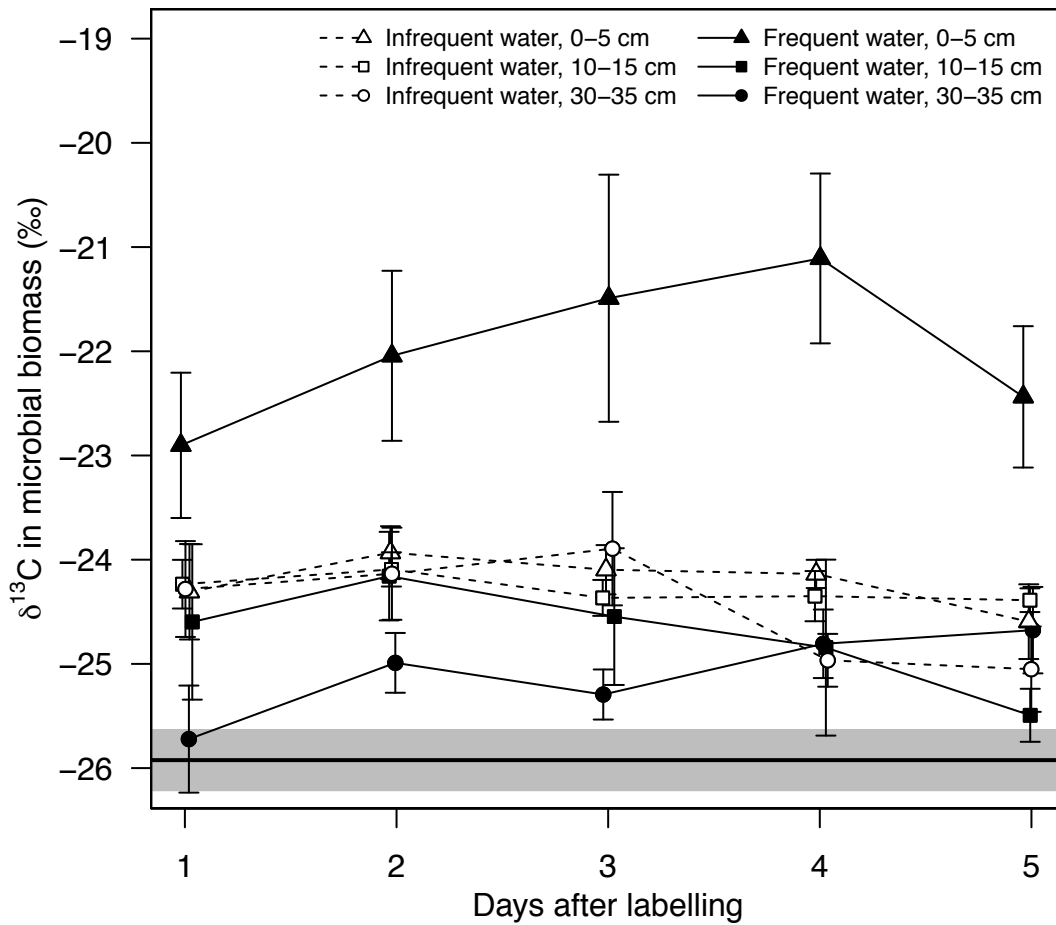

Fig. S6.  $^{13}\text{C}$  signature in microbial biomass (mean $\pm$ se), over 5 days after plant  $^{13}\text{C}\text{-CO}_2$  labeling, in the infrequent (open symbols) and frequent (closed symbols) water input treatments, at three depths (top: 0-5 cm, triangles; middle: 10-15 cm, squares, bottom: 30-35 cm, circles). Background microbial biomass  $^{13}\text{C}$  signature mean  $\pm$  standard error is shown (horizontal line and grey polygon).



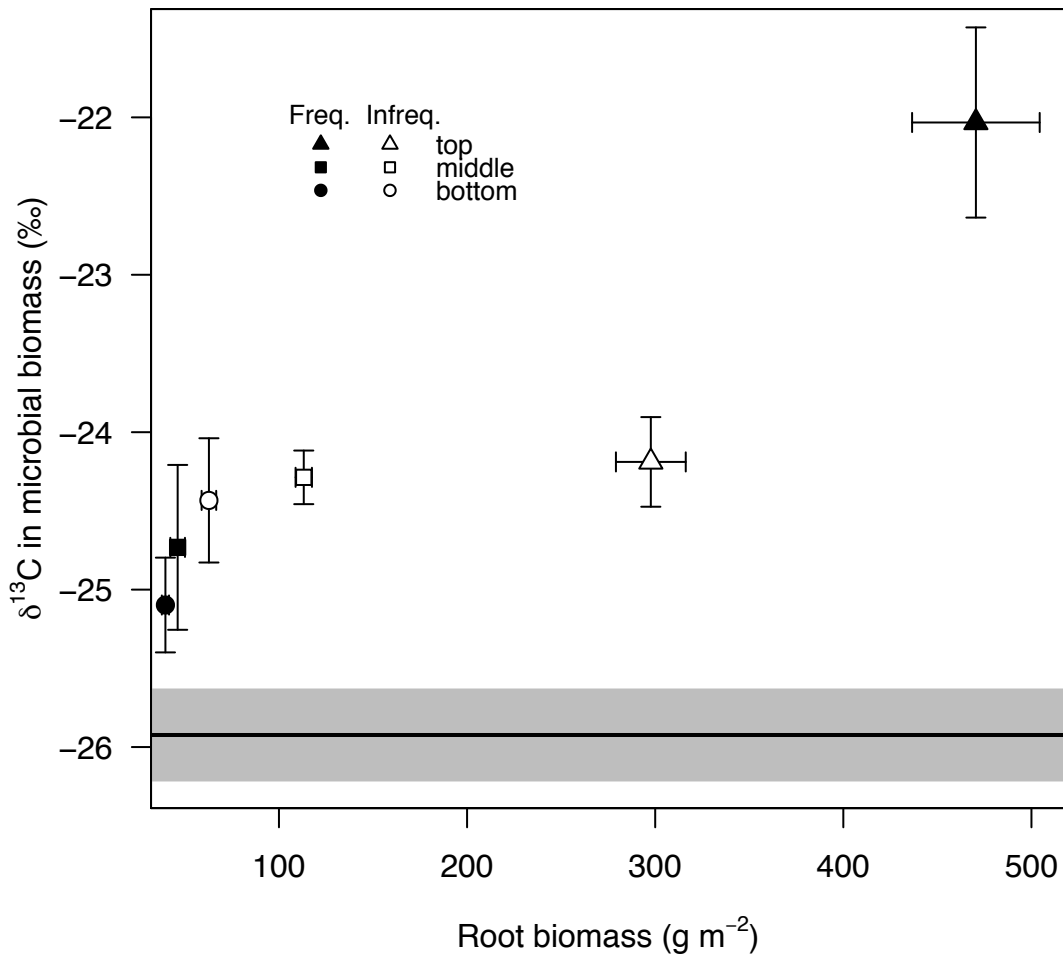

Fig. S7.  $^{13}\text{C}$  signature in microbial biomass against root biomass (mean  $\pm$  standard error) in the frequent (closed symbols) and infrequent (open symbols) water input treatments, at three depths (top: 0-5 cm, triangles; middle: 10-15 cm, squares, bottom: 30-35 cm, circles). Microbial biomass  $\delta^{13}\text{C}$  was averaged over 5 days after plant  $^{13}\text{C}\text{-CO}_2$  labeling. Background microbial biomass  $^{13}\text{C}$  signature is shown (line and grey polygon indicate mean  $\pm$  standard error).

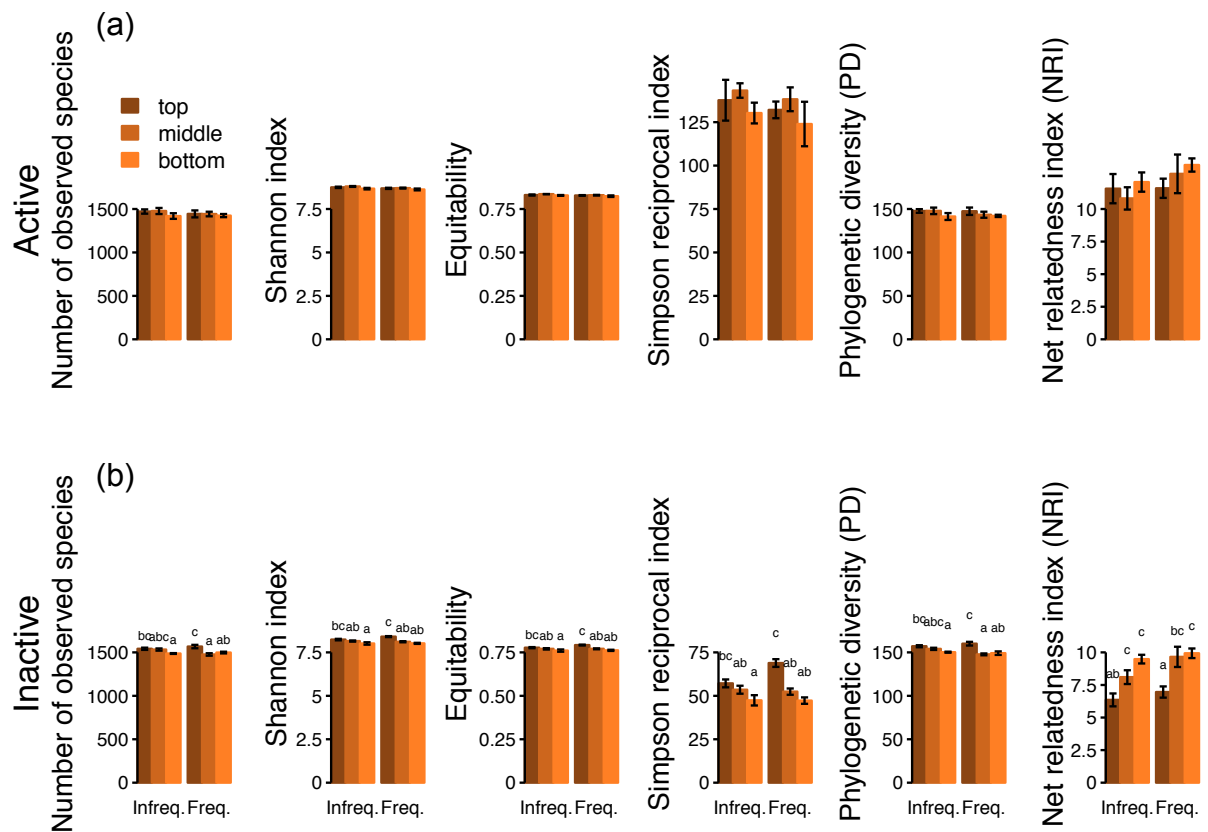

Fig. S8. Bacterial diversity indices in the active (a) and inactive (b) bacterial communities in the infrequent watering (left bar triplets) and frequent watering (right bar triplets) treatments, at three soil depths (top: 0-5 cm, brown; middle: 10-15 cm, light brown, bottom: 30-35 cm, orange). Within an index, bars that share a letter are not significantly different. Bars indicate mean  $\pm$  standard error.

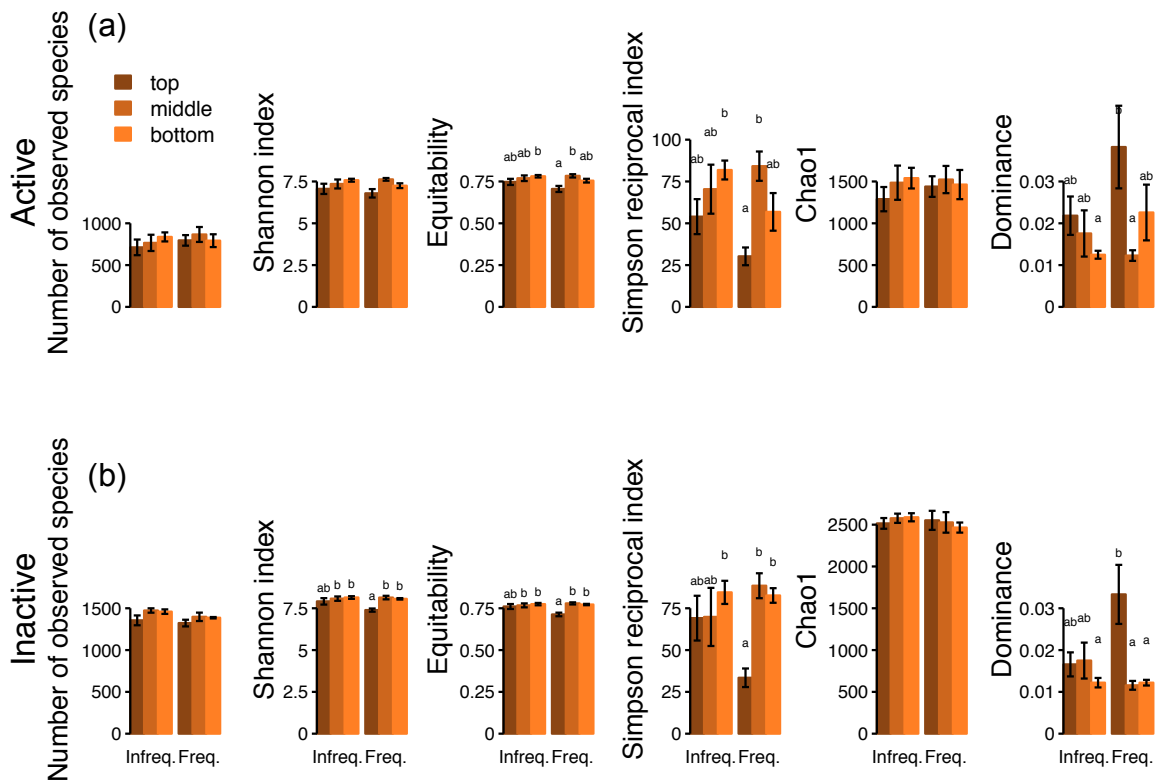

Fig. S9. Fungal diversity indices in the active (a) and inactive (b) fungal communities in the infrequent watering (left bar triplets) and frequent watering (right bar triplets) treatments, at three soil depths (top: 0-5 cm, brown; middle: 10-15 cm, light brown, bottom: 30-35 cm, orange). Within an index, letters indicate significant differences among the means: bars that share a letter are not significantly different. Bars indicate mean  $\pm$  standard error.

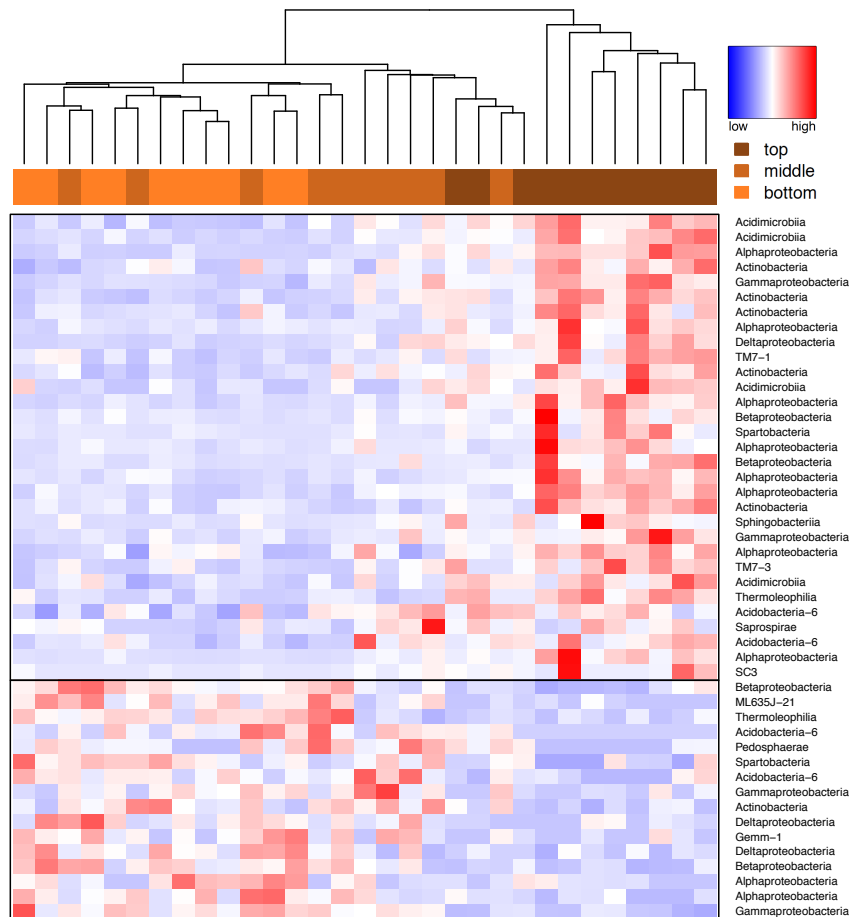

Fig. S10. Heatmap of the OTUs (labeled by class) that responded significantly to soil depth in the active bacterial community (lines, class assignment provided), across all samples (top: 0-5 cm, brown; middle: 10-15 cm, light brown, bottom: 30-35 cm, orange). The relative abundance of the OTUs across samples ranges from blue to white to red (low to medium to high relative abundance). The OTUs clustered into a "top" group and a "bottom" group, delineated by a black line.

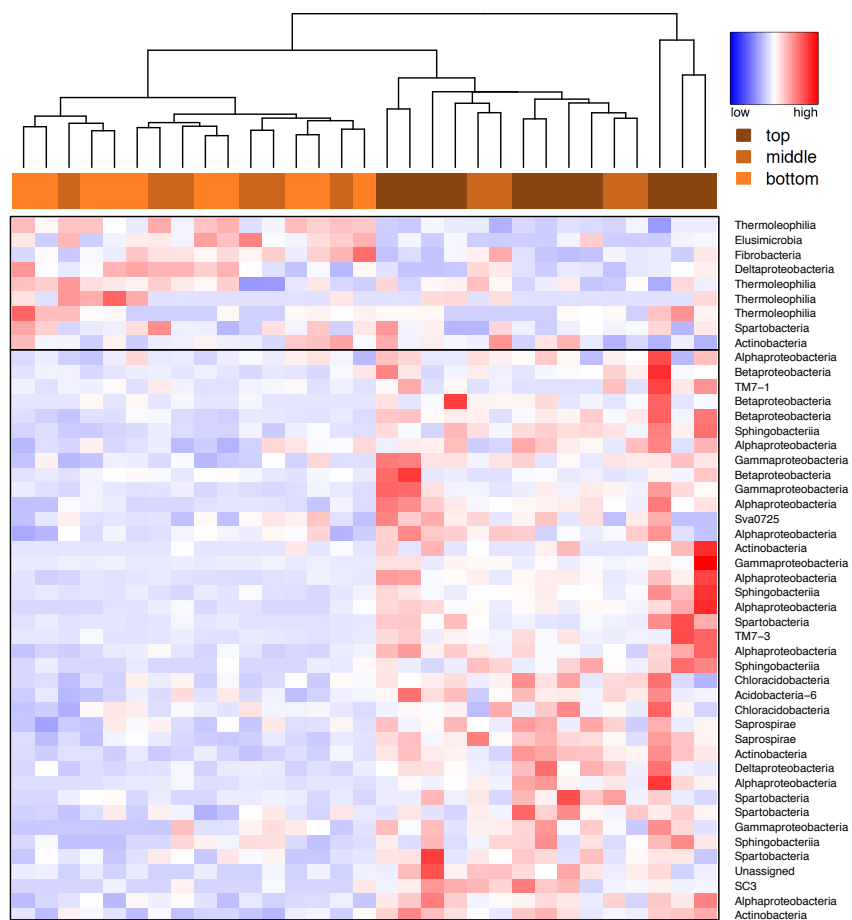

Fig. S11. Heatmap of the OTUs (labeled by class) that responded significantly to soil depth in the inactive bacterial community (lines, class assignment provided), across all samples (top: 0-5 cm, brown; middle: 10-15 cm, light brown, bottom: 30-35 cm, orange). The relative abundance of the OTUs across samples ranges from blue to white to red (low to medium to high relative abundance). The OTUs clustered into a "bottom" group and a "top" group, delineated by a black line.

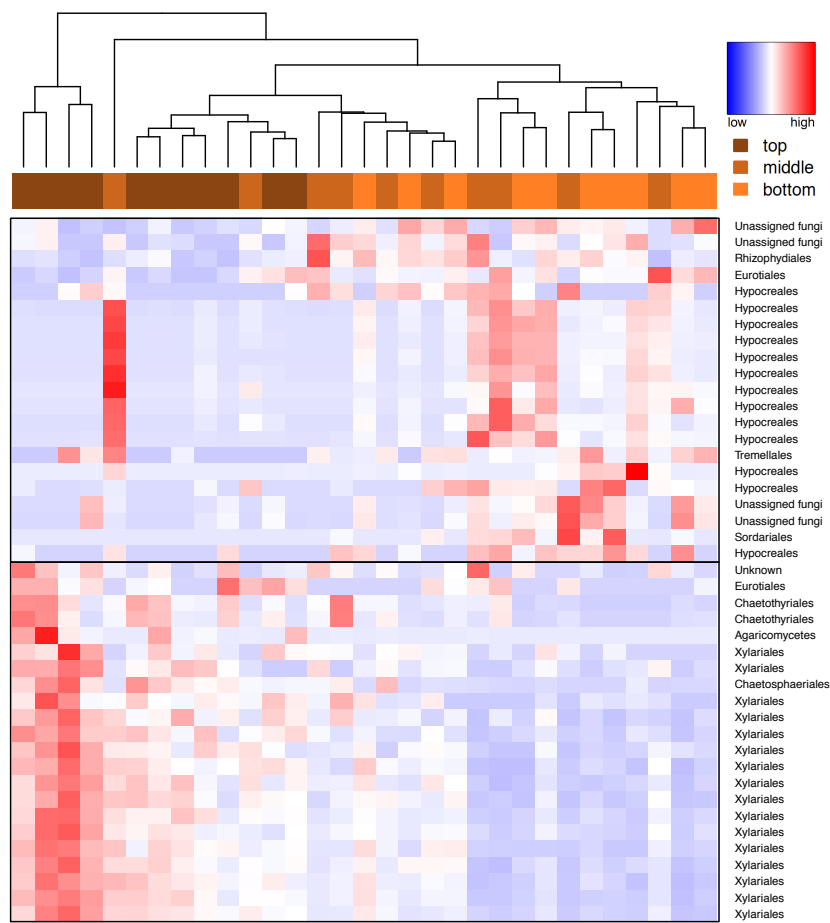

Fig. S12. Heatmap of the OTUs (labeled by order) that responded significantly to soil depth in the active fungal community (lines, class assignment provided), across all samples (top: 0-5 cm, brown; middle: 10-15 cm, light brown, bottom: 30-35 cm, orange). The relative abundance of the OTUs across samples ranges from blue to white to red (low to medium to high relative abundance). The OTUs clustered into a “top” group and a “bottom” group, delineated by a black line.

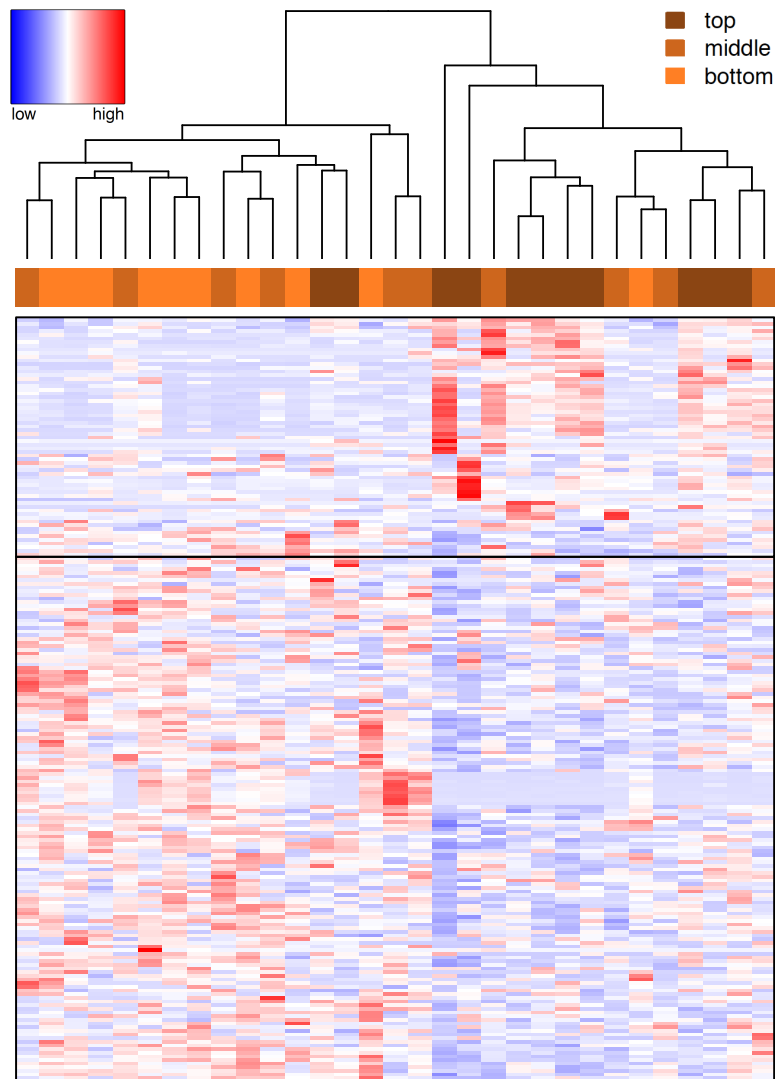

Fig. S13. Heatmap of the OTUs (no label for clarity) that responded significantly to soil depth in the inactive fungal community (lines, class assignment provided), across all samples (top: 0-5 cm, brown; middle: 10-15 cm, light brown, bottom: 30-35 cm, orange). The relative abundance of the OTUs across samples ranges from blue to white to red (low to medium to high relative abundance). The OTUs clustered into a “bottom” group and a “top” group, delineated by a black line.
